# Supplementary material
Source: PubMed Central journal article supplement (PMC6199656)
Supplement: ba020305-suppl1.pdf [file ba020305-suppl1.pdf]

**Supplemental Table 1. Comparison of therapeutic outcomes in FLT3-ITD-positive AML depending on allo-HSCT and AR**

(A) Impact on RFS and OS of allo-HSCT and *FLT3*-ITD AR (Figure 3. B)

|               |        | allo-HSCT(+) |          |            |          |            |          |            |          |
|---------------|--------|--------------|----------|------------|----------|------------|----------|------------|----------|
|               |        | AR<0.5       |          |            |          | AR≥0.5     |          |            |          |
|               |        | MRD (days)   | <i>p</i> | MST (days) | <i>p</i> | MRD (days) | <i>p</i> | MST (days) | <i>p</i> |
| allo-HSCT (-) | AR<0.5 | NR vs 172    | 0.012    | NR vs 207  | <0.001   | NR vs 172  | 0.785    | 367 vs 207 | 0.001    |
|               | AR≥0.5 | NR vs 250    | <0.001   | NR vs 294  | <0.001   | NR vs 250  | 0.784    | 367 vs 294 | 0.002    |

Figures indicate cases with allo-HSCT(+) vs. without allo-HSCT(-)

(B) Impact on RFS and OS of allo-HSCT in CR1 and *FLT3*-ITD AR (Figure 4. A)

|                          |        | allo-HSCT in CR1 |          |            |          |            |          |            |          |
|--------------------------|--------|------------------|----------|------------|----------|------------|----------|------------|----------|
|                          |        | AR<0.5           |          |            |          | AR≥0.5     |          |            |          |
|                          |        | MRD (days)       | <i>p</i> | MST (days) | <i>p</i> | MRD (days) | <i>p</i> | MST (days) | <i>p</i> |
| other cases <sup>¶</sup> | AR<0.5 | NR vs 175        | <0.001   | NR vs 329  | <0.001   | NR vs 175  | 0.003    | NR vs 329  | 0.002    |
|                          | AR≥0.5 | NR vs 124        | <0.001   | NR vs 334  | <0.001   | NR vs 124  | <0.001   | NR vs 334  | <0.001   |

Figures indicate cases with allo-HSCT in CR1 vs. other cases

¶ : cases other than those with allo-HSCT in CR1 (incl. those not receiving allo-HSCT)

(C) Impact on RFS and OS of allo-HSCT in CR1 and *FLT3*-ITD AR with *NPM1* gene mutation (Figure 4. B)

|                          |        | allo-HSCT in CR1 |          |            |          |            |          |            |          |
|--------------------------|--------|------------------|----------|------------|----------|------------|----------|------------|----------|
|                          |        | AR<0.5           |          |            |          | AR≥0.5     |          |            |          |
|                          |        | MRD (days)       | <i>p</i> | MST (days) | <i>p</i> | MRD (days) | <i>p</i> | MST (days) | <i>p</i> |
| other cases <sup>§</sup> | AR<0.5 | NR vs 160        | 0.013    | NR vs 329  | 0.003    | NR vs 160  | 0.111    | NR vs 329  | 0.038    |
|                          | AR≥0.5 | NR vs 146        | <0.001   | NR vs 294  | <0.001   | NR vs 146  | 0.036    | NR vs 294  | 0.030    |

Figures indicate cases with allo-HSCT in CR1 vs. other cases

§ : cases other than those with allo-HSCT in CR1 (incl. those not receiving allo-HSCT)

allo-HSCT: allogenic hematopoietic transplantation; CR1: first complete remission; AR: allele ratio; MRD: median remission duration; MST: median survival time; NR: not reached.

**Supplemental Table 2. Clinical background of the AML patients with *FLT3*-ITD low-AR (age<70 years)**

Supplemental Table 2. Clinical background of the AML patients with *FLT3*-ITD low-AR (age<70 years)

|                                             | All (N=37)         | <i>FLT3</i> -ITD AR < 0.5   |                             | <i>p</i> value |
|---------------------------------------------|--------------------|-----------------------------|-----------------------------|----------------|
|                                             |                    | allo-HSCT in CR1 (+) (N=15) | allo-HSCT in CR1 (-) (N=22) |                |
| Age, median years (range)                   | 53 (21-66)         | 51 (21-65)                  | 54 (27-66)                  | 0.446          |
| Sex                                         |                    |                             |                             |                |
| Male                                        | 19                 | 9                           | 10                          | 0.508          |
| Female                                      | 18                 | 6                           | 12                          |                |
| ECOG-PS, 0/1/2/3/4                          | 16/11/1/1/0        | 9/6/0/0/0                   | 7/5/1/1/0                   |                |
| WBC, median / $\mu$ L (range)               | 59660 (1000-62000) | 44600 (2700-620000)         | 63170 (1000-483000)         | 0.592          |
| Hb, median g/dL (range)                     | 8.7 (4.1-15.0)     | 9.7 (5.1-15.0)              | 8.0 (4.1-14.3)              | 0.016          |
| Plt, median $\times 10^4$ / $\mu$ L (range) | 5.3 (0.6-63.0)     | 5.2 (1.3-15.2)              | 5.8 (0.6-63.0)              | 0.428          |
| LDH, median IU/L (range)                    | 729 (151-5930)     | 496 (151-1923)              | 992 (227-5930)              | 0.046          |
| FAB                                         |                    |                             |                             |                |
| M1                                          | 14                 | 7                           | 7                           | 0.493          |
| M2                                          | 13                 | 4                           | 9                           | 0.491          |
| M4                                          | 7                  | 2                           | 5                           | 0.474          |
| M5                                          | 2                  | 1                           | 1                           | 1.000          |
| not determined                              | 1                  | 1                           | 0                           | 0.405          |
| Chromosomal aberrations                     |                    |                             |                             |                |
| t(8,21)                                     | 1                  | 0                           | 1                           | 1.000          |
| inv(16)                                     | 1                  | 0                           | 1                           | 1.000          |
| normal                                      | 27                 | 11                          | 16                          | 1.000          |
| trisomy 8                                   | 0                  | 0                           | 0                           | 1.000          |
| 11q23                                       | 0                  | 0                           | 0                           | 1.000          |
| complex                                     | 0                  | 0                           | 0                           | 1.000          |
| Unknown                                     | 5                  | 2                           | 3                           | 1.000          |
| Gene mutation                               |                    |                             |                             |                |
| <i>FLT3</i> -TKD                            | 0                  | 0                           | 0                           | 1.000          |
| <i>NPM1</i>                                 | 23                 | 8                           | 15                          | 0.493          |
| <i>CEBPA</i> (sm)                           | 3                  | 1                           | 2                           | 1.000          |
| <i>CEBPA</i> (dm)                           | 2                  | 2                           | 0                           | 0.158          |
| Induction therapy                           |                    |                             |                             |                |
| (IDA/DNR/ACR)+Ara-C                         | 17                 | 14                          | 15                          | 0.108          |
| AVVV, BHAC-DM, CAG                          | 5                  | 0                           | 7                           | 0.028          |
| Others                                      | 0                  | 0                           | 0                           | 1.000          |

AML: acute myeloid leukemia; *FLT3*-ITD: *fms-like kinase 3*-internal tandem duplication; AR: allele ratio

ECOG-PS: Eastern Cooperative Oncology Group Performance Status; *FLT3*-TKD: *fms-like kinase 3*-tyrosine kinase domain;

*NPM1*: *nucleophosmin member1*; *CEBPA*: CCAAT/ enhancer-binding protein  $\alpha$ ;

sm: single mutation; dm: double mutation; IDA: idarubicin; DNR: daunorubicin; ACR: aclarubicin;

AraC: cytarabine; AVVV: cytarabine+etoposide+vincristine+vinblastine; BHAC-DM: enocitabine + daunorubicin + 6-mercaptopurine;

CAG: cytarabine+ cytarabine+granulocyte colony-stimulating factor; HU: hydroxyurea; CR1: first complete remission.

**Note: some data are missing due to the unavailability of certain follow-up data in a retrospective study.**

**Supplemental Table 3. Clinical background of the AML patients positive for both *FLT3*-ITD low-AR and *NPM1* mutation (age<70 years)**

|                                             | All (N=19)         | <i>FLT3</i> -ITD AR < 0.5 and <i>NPM1</i> mutation |                             | <i>p</i> value |
|---------------------------------------------|--------------------|----------------------------------------------------|-----------------------------|----------------|
|                                             |                    | allo-HSCT in CR1 (+) (N=8)                         | allo-HSCT in CR1 (-) (N=11) |                |
| Age, median years (range)                   | 55 (26-66)         | 55 (26-64)                                         | 55 (27-66)                  | 0.572          |
| Sex                                         |                    |                                                    |                             | 1.000          |
| Male                                        | 9                  | 4                                                  | 5                           |                |
| Female                                      | 10                 | 4                                                  | 6                           |                |
| ECOG-PS, 0/1/2/3/4                          | 9/5/1/0/0          | 5/3/0/0/0                                          | 4/2/1/0/0                   |                |
| WBC, median / $\mu$ L (range)               | 66200(1000-470500) | 79650 (2700-176000)                                | 49900 (1000-470500)         | 0.358          |
| Hb, median g/dL (range)                     | 9.0 (4.7-14.3)     | 9.4 (5.1-12.5)                                     | 8.8 (4.7-14.3)              | 0.533          |
| Plt, median $\times 10^4$ / $\mu$ L (range) | 5.2 (1.1-15.2)     | 7.1 (1.3-15.2)                                     | 4.5 (1.1-10.8)              | 0.231          |
| LDH, median IU/L (range)                    | 738 (204-3788)     | 496 (204-805)                                      | 769 (227-3788)              | 0.207          |
| FAB                                         |                    |                                                    |                             |                |
| M1                                          | 10                 | 4                                                  | 6                           | 1.000          |
| M2                                          | 4                  | 1                                                  | 3                           | 0.603          |
| M4                                          | 3                  | 2                                                  | 1                           | 0.566          |
| M5                                          | 2                  | 1                                                  | 1                           | 1.000          |
| Chromosomal aberrations                     |                    |                                                    |                             |                |
| t(8,21)                                     | 0                  | 0                                                  | 0                           | 1.000          |
| inv(16)                                     | 0                  | 0                                                  | 0                           | 1.000          |
| normal                                      | 15                 | 6                                                  | 9                           | 1.000          |
| trisomy 8                                   | 0                  | 0                                                  | 0                           | 1.000          |
| 11q23                                       | 0                  | 0                                                  | 0                           | 1.000          |
| complex                                     | 0                  | 0                                                  | 0                           | 1.000          |
| Unknown                                     | 3                  | 1                                                  | 2                           | 1.000          |
| Gene mutation                               |                    |                                                    |                             |                |
| <i>FLT3</i> -TKD                            | 0                  | 0                                                  | 0                           | 1.000          |
| <i>NPM1</i>                                 | 19                 | 8                                                  | 11                          | 1.000          |
| <i>CEBPA</i> ( sm)                          | 0                  | 0                                                  | 0                           | 1.000          |
| <i>CEBPA</i> ( dm)                          | 0                  | 0                                                  | 0                           | 1.000          |
| Induction therapy                           |                    |                                                    |                             | 0.103          |
| (IDA/ DNR/ ACR) +Ara-C                      | 15                 | 8                                                  | 7                           |                |
| AVVV, BHAC-DM, CAG                          | 4                  | 0                                                  | 4                           |                |
| Others                                      | 0                  | 0                                                  | 0                           |                |

AML: acute myeloid leukemia; *FLT3*-ITD: *fms-like kinase 3*-internal tandem duplication; AR: allele ratio

ECOG-PS: Eastern Cooperative Oncology Group Performance Status; *FLT3*-TKD: *fms-like kinase 3*-tyrosine kinase domain;

*NPM1*: *nucleophosmin member1*; *CEBPA*: CCAAT/ enhancer-binding protein  $\alpha$ ;

sm: single mutation; dm: double mutation; IDA: idarubicin; DNR: daunorubicin; ACR: aclarubicin;

AraC: cytarabine; AVVV: cytarabine+etoposide+vincristine+vinblastine; BHAC-DM: enocitabine + daunorubicin + 6-mercaptopurine;

CAG: cytarabine+ cytarabine+granulocyte colony-stimulating factor; HU: hydroxyurea; CR1: first complete remission.

**Note: some data are missing due to the unavailability of certain follow-up data in a retrospective study.**

Supplemental Figure 1. *FLT3*-ITD allele frequency and *FLT3*-ITD size

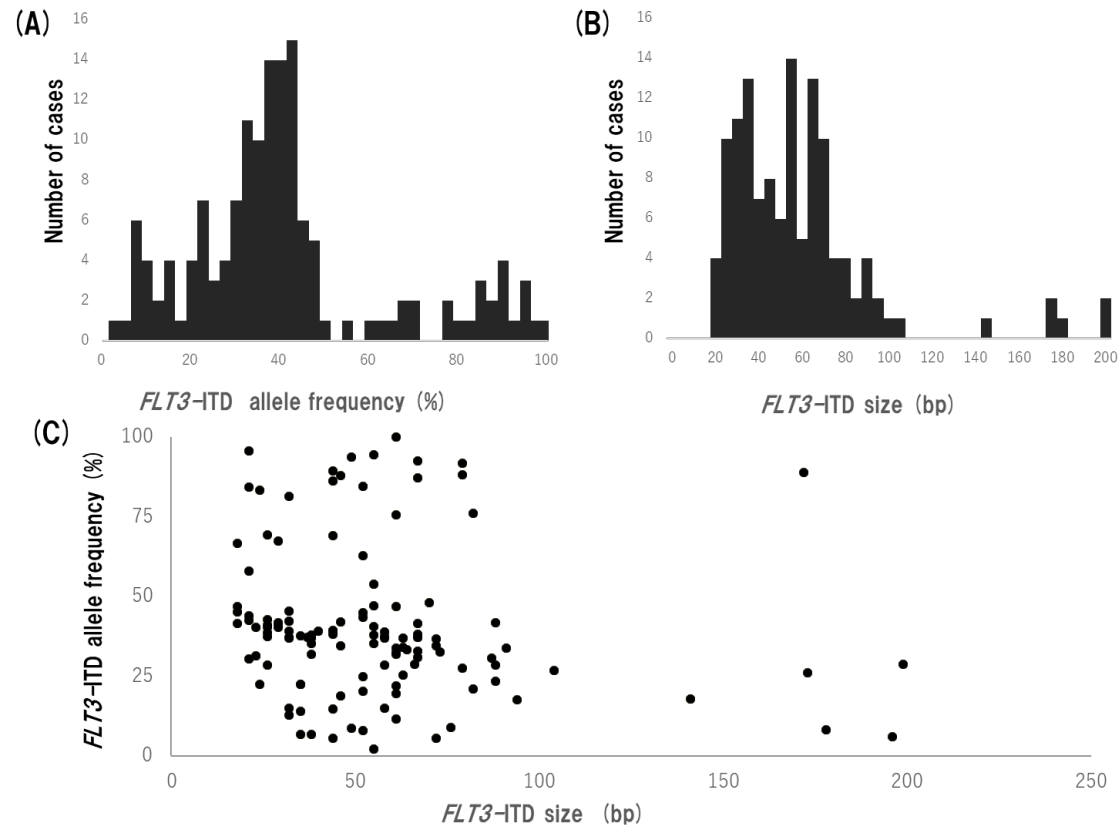

(A) Total *FLT3*-ITD allele frequency in 147 *FLT3*-ITD<sup>+</sup> patients.

(B) *FLT3*-ITD size in 124 cases with a single mutant.

(C) Correlation between *FLT3*-ITD allele frequency and size.

Supplemental Figure 2. Impact on RFS and OS of *FLT3*-ITD AR

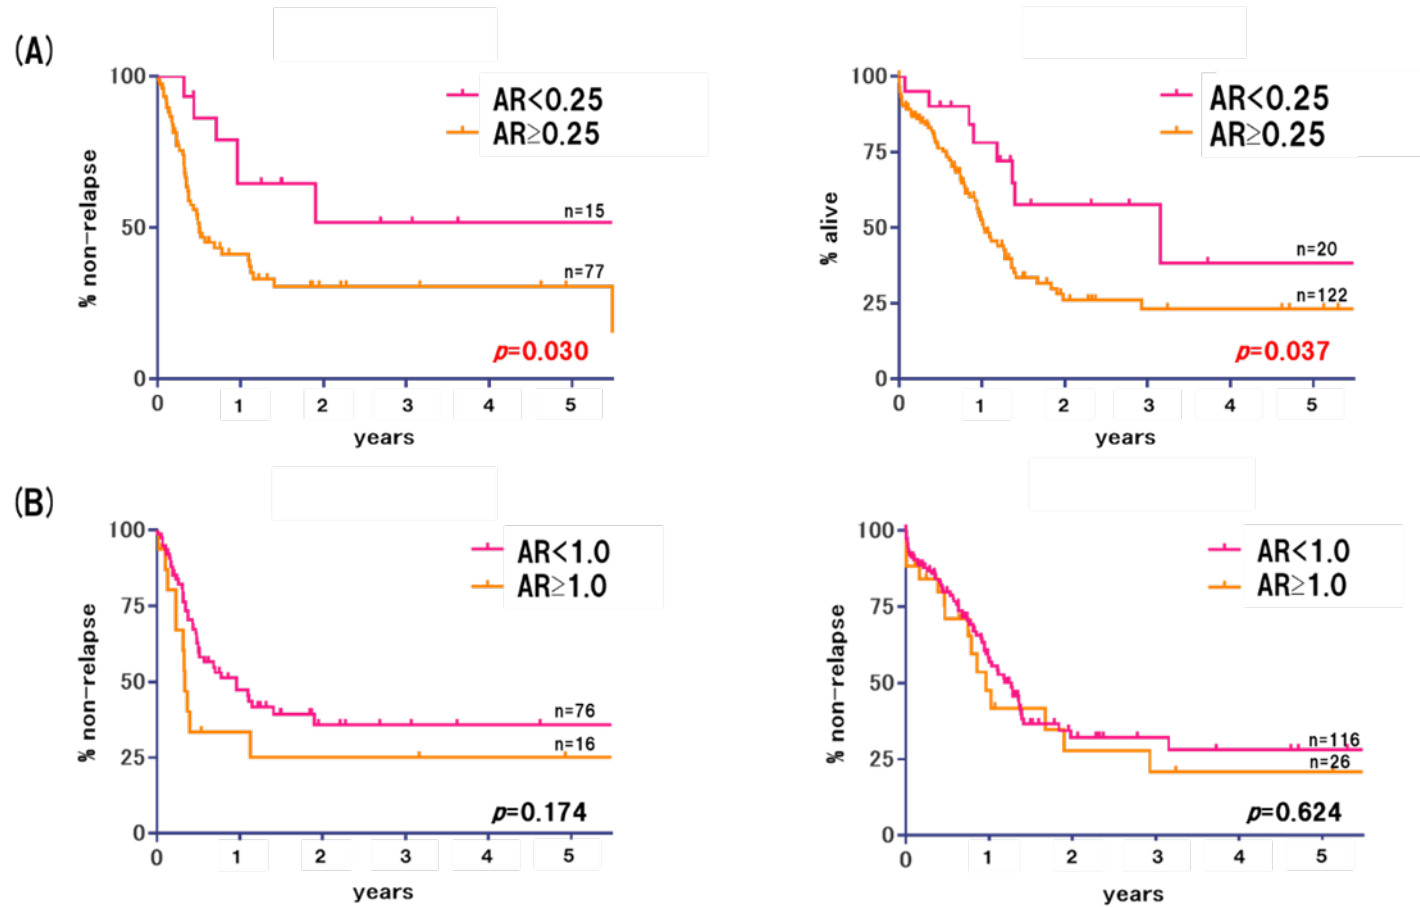

(A) RFS(left) and OS(right) of *FLT3*-ITD AR cutoff value set at 0.25

(B) RFS(left) and OS(right) of *FLT3*-ITD AR cutoff value set at 1.00

Supplemental Figure 3. Impact on RFS and OS of *FLT3*-ITD-positive AML patients

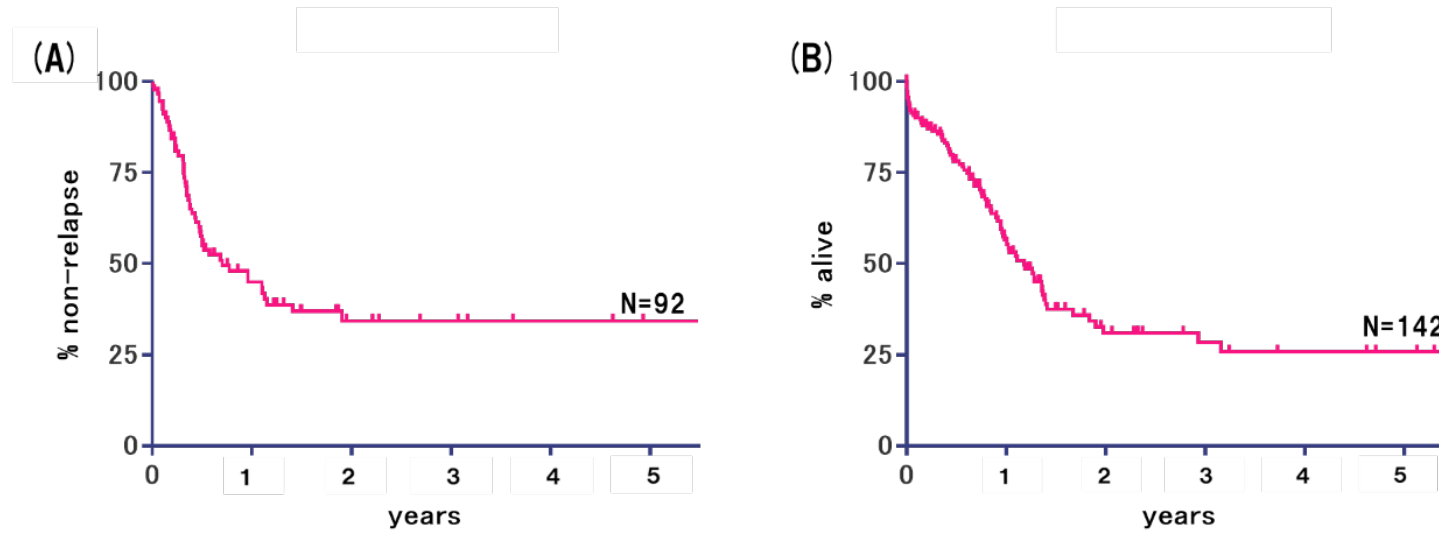

(A)\_RFS (B)\_OS

**Supplemental Figure 4. Prognostic impact of allo-HSCT in CR1 in patients aged below 70 years with low-AR *FLT3-ITD***

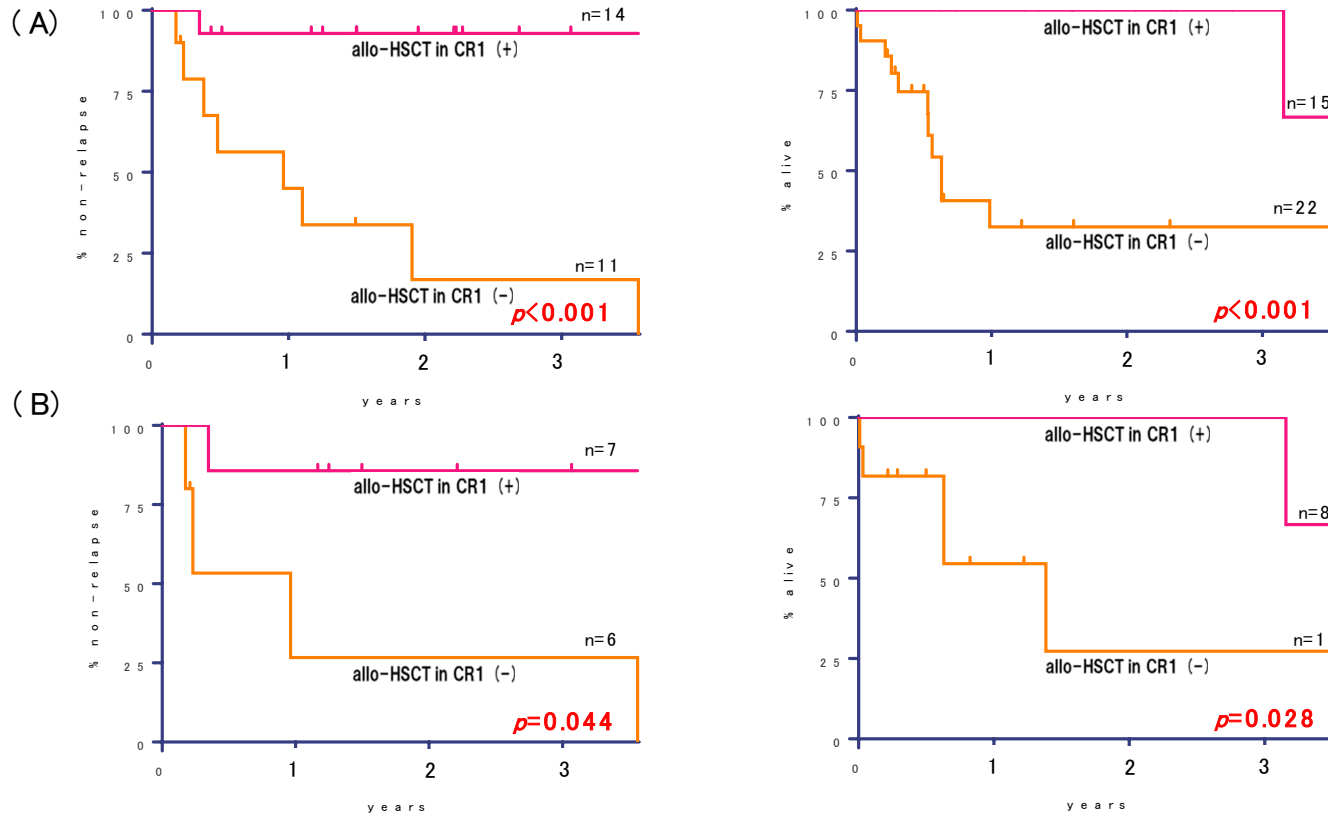

(A) RFS (left) and OS (right)

(B) NPM1 mutation-positive cases: RFS (left) and OS (right)
